# Supplementary material for: Optic-nerve-transmitted eyeshine, a new type of light emission from fish eyes
Source: PubMed Central journal article supplement (PMC5327540; doi:10.1186/s12983-017-0198-9), 2017-02-27
Supplement: 12983_2017_198_MOESM5_ESM.pdf [file 12983_2017_198_MOESM5_ESM.pdf]

**Add. File 09:** Chromatic and achromatic contrast between the pupil with and without the optic nerve transmitted eyeshine, as perceived by *T. delaisi*, to assess the potential for intraspecific communication. The model assumes a trichromatic visual system for *T. delaisi* based on micro-spectrophotometric data (unpublished). Chromatic difference values and achromatic difference values are expressed in just-noticeable-differences. See Materials and Methods for more details on model parameters and explanation of values presented.

| 5 m depth |            | 20 m depth |            |                                        |
|-----------|------------|------------|------------|----------------------------------------|
| Chromatic | Achromatic | Chromatic  | Achromatic |                                        |
| 0.50      | 7.59       | 0.41       | 7.86       | <b>individual</b><br><i>T. delaisi</i> |
| 0.44      | 6.56       | 0.34       | 6.81       |                                        |
| 0.41      | 3.90       | 0.34       | 4.09       |                                        |
| 0.19      | 2.82       | 0.15       | 2.94       |                                        |
| 0.20      | 3.39       | 0.16       | 3.49       |                                        |
| 0.35      | 4.85       | 0.97       | 5.04       | <b>mean</b>                            |
