# Supplementary material for: Optic-nerve-transmitted eyeshine, a new type of light emission from fish eyes
Source: PubMed Central journal article supplement (PMC5327540; doi:10.1186/s12983-017-0198-9), 2017-02-27
Supplement: 12983_2017_198_MOESM7_ESM.pdf [file 12983_2017_198_MOESM7_ESM.pdf]

**Add. File 06:** Overview of individual, absolute anatomical data and summary per species.

| fish                       | section type | TL (mm)      | MHD (mm)     | EBV (mm <sup>3</sup> ) | Skull (bone) thickness ± SD <sub>intra</sub> (µm) | Dermis thickness ± SD <sub>intra</sub> (µm) | ON depth ± SD <sub>intra</sub> (mm) | ON layers (#)     | ON layer thickness ± SD <sub>intra</sub> (µm) | Mean ON CSA ± SD <sub>intra</sub> (mm <sup>2</sup> ) | Comments                                                                                                                                                    |
|----------------------------|--------------|--------------|--------------|------------------------|---------------------------------------------------|---------------------------------------------|-------------------------------------|-------------------|-----------------------------------------------|------------------------------------------------------|-------------------------------------------------------------------------------------------------------------------------------------------------------------|
| Td1                        | 10 µm        | 62           | 7.5          | 913                    | -                                                 | -                                           | -                                   | 7                 | 60.0 ± 8.1                                    | 0.170 ± 0.046                                        | section series compromised<br><br>* Only used for qualitative intra-ocular ON and retina structure. Since cropped to ROI, measurements would be incomplete. |
| Td2                        | 10 µm        | 52           | 6.8          | 629                    | -                                                 | -                                           | -                                   | 8                 | 64.9 ± 14.9                                   | 0.144 ± 0.055                                        |                                                                                                                                                             |
| Td3                        | 10 µm        | 57           | 7.1          | 752                    | -                                                 | -                                           | -                                   | -                 | -                                             |                                                      |                                                                                                                                                             |
| Td4                        | 10 µm        | 50           | 6.6          | 570                    | 53.3 ± 20.3                                       | 89.5 ± 30.0                                 | 1.61 ± 0.18                         | 8.5               | 39.7 ± 7.1                                    | 0.092 ± 0.024                                        |                                                                                                                                                             |
| Td5                        | 1 µm         | 47           | 6.6          | 536                    | -                                                 | -                                           | -                                   | -                 | -                                             |                                                      |                                                                                                                                                             |
| Td6                        | 1 µm         | 50           | 6.6          | 570                    | -                                                 | -                                           | -                                   | -                 | -                                             |                                                      |                                                                                                                                                             |
| Td7                        | 1 µm         | 56           | 7            | 718                    | -                                                 | -                                           | -                                   | -                 | -                                             |                                                      |                                                                                                                                                             |
| Td8                        | 1 µm         | 50           | 6.5          | 553                    | -                                                 | -                                           | -                                   | -                 | -                                             |                                                      |                                                                                                                                                             |
| Td9                        | MRI          | 58           | 7.5          | 854                    | 61.3 ± 15.6                                       | 89.6 ± 43.7                                 | 1.57 ± 0.37                         | -                 | -                                             | -                                                    |                                                                                                                                                             |
| Td10                       | MRI          | 54           | 7.25         | 743                    | 47.5 ± 9.9                                        | 103.4 ± 24.8                                | 1.53 ± 0.25                         | -                 | -                                             | -                                                    |                                                                                                                                                             |
| <b><i>T. delaisi</i></b>   |              | <b>53.6</b>  | <b>6.9</b>   | <b>684</b>             | <b>54.0 ± 6.9</b>                                 | <b>94.2 ± 8.0</b>                           | <b>1.57 ± 0.04</b>                  | <b>7.8 ± 0.8</b>  | <b>54.9 ± 13.4</b>                            | <b>0.135 ± 0.040</b>                                 |                                                                                                                                                             |
| <b>Mean ± SD</b>           |              | <b>± 4.6</b> | <b>± 0.4</b> | <b>± 133</b>           |                                                   |                                             |                                     |                   |                                               |                                                      |                                                                                                                                                             |
| Tm1                        | 10 µm        | 45           | 5.05         | 300                    | -                                                 | -                                           | -                                   | 6                 | 47.9 ± 8.4                                    | 0.089 ± 0.021                                        | see *                                                                                                                                                       |
| Tm2                        | 10 µm        | 34           | 4.3          | 165                    | 33 ± 8.9                                          | 30.9 ± 19.8                                 | 1.05 ± 0.07                         | 7                 | 32.2 ± 3.8                                    | 0.040 ± 0.011                                        |                                                                                                                                                             |
| Tm3                        | 1 µm         | 39           | 4.55         | 211                    | -                                                 | -                                           | -                                   | -                 | -                                             | -                                                    |                                                                                                                                                             |
| Tm4                        | MRI          | 44           | 5.55         | 355                    | 43.6 ± 11.3                                       | 39.6 ± 13.7                                 | 1.12 ± 0.25                         | -                 | -                                             | -                                                    |                                                                                                                                                             |
| <b><i>T. melanurus</i></b> |              | <b>40.5</b>  | <b>4.9</b>   | <b>258</b>             | <b>38.3 ± 7.5</b>                                 | <b>35.3 ± 6.2</b>                           | <b>1.09 ± 0.05</b>                  | <b>6.5 ± 0.7</b>  | <b>40.1 ± 11.1</b>                            | <b>0.065 ± 0.035</b>                                 |                                                                                                                                                             |
| <b>Mean ± SD</b>           |              | <b>± 5.1</b> | <b>± 0.6</b> | <b>± 86</b>            |                                                   |                                             |                                     |                   |                                               |                                                      |                                                                                                                                                             |
| <b><i>P. zvonimiri</i></b> | 10 µm        | 42           | 5.55         | 339                    | 84.2 ± 54.7                                       | 260.6 ± 160.4                               | 1.38 ± 0.21                         | 4.5               | 63.5 ± 8.4                                    | 0.124 ± 0.037                                        |                                                                                                                                                             |
| Ao1                        | 1 µm         | 56           | 10.7         | 1679                   | -                                                 | -                                           | -                                   | -                 | -                                             | -                                                    | see *                                                                                                                                                       |
| Ao2                        | 1 µm         | 47           | 8.6          | 910                    | -                                                 | -                                           | -                                   | -                 | -                                             | -                                                    |                                                                                                                                                             |
| Ao3                        | 1 µm         | 47           | 8.5          | 889                    | -                                                 | -                                           | -                                   | -                 | -                                             | -                                                    |                                                                                                                                                             |
| Ao4                        | 10 µm        | 57           | 10.2         | 1553                   | -                                                 | -                                           | -                                   | 10                | 46.7 ± 4.7                                    | 0.089 ± 0.019                                        |                                                                                                                                                             |
| Ao5                        | 10 µm        | 56           | 10.65        | 1663                   | -                                                 | -                                           | -                                   | 11                | 43.3 ± 9.0                                    | 0.096 ± 0.012                                        |                                                                                                                                                             |
| Ao6                        | 10 µm        | 50           | 9.3          | 1132                   | 232.6 ± 92.0                                      | 207.4 ± 118.1                               | 1.84 ± 0.16                         | 9.5               | 38.1 ± 8.0                                    | 0.104 ± 0.013                                        |                                                                                                                                                             |
| Ao7                        | MRI          | 52           | 10.2         | 1416                   | 227.5 ± 64.7                                      | 224.6 ± 104.6                               | 2.09 ± 0.21                         | -                 | -                                             | -                                                    |                                                                                                                                                             |
| Ao8                        | MRI          | 49           | 9.05         | 1051                   | 248.9 ± 68.3                                      | 281.2 ± 127.2                               | 2.12 ± 0.18                         | -                 | -                                             | -                                                    |                                                                                                                                                             |
| Ao9                        | MRI          | 62           | 12.35        | 2476                   | 313.1 ± 103.3                                     | 386.8 ± 174.2                               | 2.58 ± 0.12                         | -                 | -                                             | -                                                    |                                                                                                                                                             |
| <b><i>A. ocellaris</i></b> |              | <b>52.9</b>  | <b>10.0</b>  | <b>1419</b>            | <b>255.5 ± 39.5</b>                               | <b>275.0 ± 80.9</b>                         | <b>2.16 ± 0.31</b>                  | <b>10.2 ± 0.8</b> | <b>42.7 ± 4.3</b>                             | <b>0.096 ± 0.007</b>                                 |                                                                                                                                                             |
| <b>Mean ± SD</b>           |              | <b>± 5.2</b> | <b>± 1.2</b> | <b>± 503</b>           |                                                   |                                             |                                     |                   |                                               |                                                      |                                                                                                                                                             |

CSA = Cross-sectional area; EBV = Estimated body volume; MHD = Mean head diameter; ON = Optic nerve; ROI = region of interest; SD = standard deviation of means per species; SD<sub>intra</sub> = SD of subsamples within individual, TL = Total length
