# Supplementary material for: Optic-nerve-transmitted eyeshine, a new type of light emission from fish eyes
Source: PubMed Central journal article supplement (PMC5327540; doi:10.1186/s12983-017-0198-9), 2017-02-27
Supplement: 12983_2017_198_MOESM8_ESM.pdf [file 12983_2017_198_MOESM8_ESM.pdf]

**Add. File 07: Overview of relative, size-corrected, individual data and summary per species.**

| fish                            | Skull (bone)<br>thickness $\pm$ SD <sub>intra</sub><br>(% of MHD) | Dermis<br>thickness $\pm$ SD <sub>intra</sub><br>(% of MHD) | ON depth<br>$\pm$ SD <sub>intra</sub><br>(% of MHD) | ON layer<br>thickness $\pm$ SD <sub>intra</sub><br>(% of AON $\emptyset$ ) | Mean ON CSA<br>$\pm$ SD <sub>intra</sub><br>(% of Head CSA) |
|---------------------------------|-------------------------------------------------------------------|-------------------------------------------------------------|-----------------------------------------------------|----------------------------------------------------------------------------|-------------------------------------------------------------|
| Td1                             | -                                                                 | -                                                           | -                                                   | 12.9 $\pm$ 1.7                                                             | 0.38 $\pm$ 0.10                                             |
| Td2                             | -                                                                 | -                                                           | -                                                   | 15.2 $\pm$ 3.5                                                             | 0.40 $\pm$ 0.15                                             |
| Td4                             | 0.81 $\pm$ 0.31                                                   | 1.36 $\pm$ 0.45                                             | 24.4 $\pm$ 2.7                                      | 11.6 $\pm$ 2.1                                                             | 0.27 $\pm$ 0.07                                             |
| Td9                             | 0.82 $\pm$ 0.21                                                   | 1.19 $\pm$ 0.58                                             | 20.9 $\pm$ 4.9                                      | -                                                                          | -                                                           |
| Td10                            | 0.66 $\pm$ 0.14                                                   | 1.43 $\pm$ 0.34                                             | 21.1 $\pm$ 3.4                                      | -                                                                          | -                                                           |
| <b><i>T. delaisi</i></b>        |                                                                   |                                                             |                                                     |                                                                            |                                                             |
| <b>Mean <math>\pm</math> SD</b> | <b>0.76 <math>\pm</math> 0.09</b>                                 | <b>1.33 <math>\pm</math> 0.12</b>                           | <b>22.1 <math>\pm</math> 2.0</b>                    | <b>13.2 <math>\pm</math> 2.1</b>                                           | <b>0.35 <math>\pm</math> 0.07</b>                           |
| Tm1                             | -                                                                 | -                                                           | -                                                   | 14.2 $\pm$ 2.5                                                             | 0.44 $\pm$ 0.10                                             |
| Tm2                             | 0.77 $\pm$ 0.21                                                   | 0.72 $\pm$ 0.46                                             | 24.4 $\pm$ 1.6                                      | 14.3 $\pm$ 1.7                                                             | 0.28 $\pm$ 0.08                                             |
| Tm4                             | 0.79 $\pm$ 0.20                                                   | 0.71 $\pm$ 0.25                                             | 20.2 $\pm$ 4.5                                      | -                                                                          | -                                                           |
| <b><i>T. melanurus</i></b>      |                                                                   |                                                             |                                                     |                                                                            |                                                             |
| <b>Mean <math>\pm</math> SD</b> | <b>0.78 <math>\pm</math> 0.01</b>                                 | <b>0.72 <math>\pm</math> 0.004</b>                          | <b>22.3 <math>\pm</math> 3.0</b>                    | <b>14.2 <math>\pm</math> 0.03</b>                                          | <b>0.36 <math>\pm</math> 0.12</b>                           |
| <b><i>P. zvonimiri</i></b>      |                                                                   |                                                             |                                                     |                                                                            |                                                             |
|                                 | 1.52 $\pm$ 0.99                                                   | 4.70 $\pm$ 2.89                                             | 24.9 $\pm$ 3.8                                      | 16.0 $\pm$ 2.1                                                             | 0.51 $\pm$ 0.15                                             |
| Ao4                             | -                                                                 | -                                                           | -                                                   | 13.9 $\pm$ 1.4                                                             | 0.11 $\pm$ 0.02                                             |
| Ao5                             | -                                                                 | -                                                           | -                                                   | 12.4 $\pm$ 2.6                                                             | 0.11 $\pm$ 0.01                                             |
| Ao6                             | 2.50 $\pm$ 0.99                                                   | 2.23 $\pm$ 1.27                                             | 19.8 $\pm$ 1.7                                      | 10.5 $\pm$ 2.2                                                             | 0.15 $\pm$ 0.02                                             |
| Ao7                             | 2.23 $\pm$ 0.63                                                   | 2.20 $\pm$ 1.03                                             | 20.5 $\pm$ 2.1                                      | -                                                                          | -                                                           |
| Ao8                             | 2.75 $\pm$ 0.75                                                   | 3.11 $\pm$ 1.41                                             | 23.4 $\pm$ 2.0                                      | -                                                                          | -                                                           |
| Ao9                             | 2.54 $\pm$ 0.84                                                   | 3.13 $\pm$ 1.41                                             | 20.9 $\pm$ 1.0                                      | -                                                                          | -                                                           |
| <b><i>A. ocellaris</i></b>      |                                                                   |                                                             |                                                     |                                                                            |                                                             |
| <b>Mean <math>\pm</math> SD</b> | <b>2.50 <math>\pm</math> 0.21</b>                                 | <b>2.67 <math>\pm</math> 0.52</b>                           | <b>21.1 <math>\pm</math> 1.6</b>                    | <b>12.2 <math>\pm</math> 1.7</b>                                           | <b>0.12 <math>\pm</math> 0.03</b>                           |

AON  $\emptyset$  = approximated optic nerve diameter ( $2 \cdot \sqrt{\frac{\text{ON CSA}}{\pi}}$ ); CSA = cross-section area; MHD = mean head diameter; SD = standard deviation of means per species; SD<sub>intra</sub> = SD of subsamples within individual
