# Supplementary material for: Optic-nerve-transmitted eyeshine, a new type of light emission from fish eyes
Source: PubMed Central journal article supplement (PMC5327540; doi:10.1186/s12983-017-0198-9), 2017-02-27
Supplement: 12983_2017_198_MOESM9_ESM.pdf [file 12983_2017_198_MOESM9_ESM.pdf]

### Add. File 08: Optic nerve torsion linear fit parameter estimates.

| fish                | eye   | ON length [mm]     | N        | R <sup>2</sup>       | Starting angle [°] | P <sub>s</sub> | Torsion [°/mm]     | P <sub>T</sub> | Total torsion [°]   |
|---------------------|-------|--------------------|----------|----------------------|--------------------|----------------|--------------------|----------------|---------------------|
| Td1                 | Left  | 0.91               | 17       | 0.883                | 0.5 (0)            | 0.9008         | 58.2               | 0.0001         | 52.7                |
|                     | Right | 0.99               | 15       | 0.934                | 49.2               | 0.0001         | 139.2              | 0.0001         | 137.8               |
| Td2                 | Left  | 0.71               | 9        | 0.636                | 41.8               | 0.0001         | 93.8               | 0.0021         | 66.3                |
| Td4                 | Left  | 0.99               | 15       | 0.972                | 12.4               | 0.0005         | 98.5               | 0.0001         | 97.5                |
|                     | Right | 0.99               | 15       | 0.957                | 17.1               | 0.0001         | 94.0               | 0.0001         | 93.1                |
| Tm1                 | Left  | 0.74               | 14       | 0.914                | 19.2               | 0.0001         | 59.6               | 0.0001         | 43.8                |
|                     | Right | 0.51               | 10       | 0.822                | 10.8 (0)           | 0.0601         | 99.0               | 0.0003         | 50.4                |
| Tm2                 | Left  | 0.68               | 13       | 0.977                | 18.8               | 0.0001         | 124.9              | 0.0001         | 84.8                |
|                     | Right | 0.85               | 13       | 0.868                | 8.5 (0)            | 0.0754         | 73.2               | 0.0001         | 62.1                |
| <b>Tripterygion</b> |       |                    |          |                      |                    |                |                    |                |                     |
| <b>Mean ± SD</b>    |       | <b>0.81 ± 0.16</b> | <b>5</b> | <b>0.859 ± 0.130</b> | <b>19.3 ± 9.6</b>  |                | <b>93.4 ± 8.2</b>  |                | <b>75.5 ± 20.5</b>  |
| Pz1                 | Left  | 0.96               | 18       | 0.759                | 13.2 (0)           | 0.087          | 72.9               | 0.0001         | 70.1                |
|                     | Right | 0.96               | 18       | 0.898                | 25.1               | 0.0007         | 84.5               | 0.0001         | 81.3                |
| <b>Parablennius</b> |       |                    |          |                      |                    |                |                    |                |                     |
| <b>Mean</b>         |       | <b>0.96</b>        | <b>1</b> | <b>0.828</b>         | <b>12.5</b>        |                | <b>78.7</b>        |                | <b>75.7</b>         |
| Ao4                 | Left  | 1.41               | 21       | 0.904                | 6.6 (0)            | 0.2069         | 81.7               | 0.0001         | 115.6               |
| Ao5                 | Left  | 1.48               | 22       | 0.705                | 34.7               | 0.0087         | 95.1               | 0.0001         | 141.2               |
| Ao6                 | Left  | 1.41               | 21       | 0.923                | 3.8 (0)            | 0.1876         | 63.1               | 0.0001         | 89.3                |
|                     | Right | 1.20               | 18       | 0.877                | 0.6 (0)            | 0.886          | 78.3               | 0.0001         | 94.1                |
| <b>Amphiprion</b>   |       |                    |          |                      |                    |                |                    |                |                     |
| <b>Mean ± SD</b>    |       | <b>1.40 ± 0.09</b> | <b>3</b> | <b>0.836 ± 0.114</b> | <b>11.6 ± 20.0</b> |                | <b>82.5 ± 12.2</b> |                | <b>116.2 ± 24.8</b> |

N indicates sampled sections per nerve or individuals for mean calculation (bold). (0) indicates parameter not significantly different from zero, hence 0 was used in mean calculation. Parameters were first averaged per individual (not shown, except *P. z.*), then per genus (bold).
